# Supplementary material for: Linked Selection and Gene Density Shape Genome‐Wide Patterns of Diversification in Peatmosses
Source: PubMed Central journal article supplement (PMC11333200; doi:10.1111/eva.13767), 2024-08-19
Supplement: EVA-17-e13767-s001.pdf [file EVA-17-e13767-s001.pdf]

## Supplementary Materials

**Table S1.** Specimens used in the study. ENA - The European Nucleotide Archive. The specimens' tissues are deposited in Trondheim Herbarium, for accession IDs and detailed sequencing summary see Table S1 in Meleshko et al. 2021.

| Species                       | Number of samples | ENA study accession | ENA sample accessions     |
|-------------------------------|-------------------|---------------------|---------------------------|
| <i>Sphagnum capillifolium</i> | 17                | PRJEB39751          | SAMEA7502614-SAMEA7502630 |
| <i>Sphagnum compactum</i>     | 13                | PRJEB39751          | SAMEA7502631-SAMEA7502643 |
| <i>Sphagnum divinum</i>       | 18                | PRJEB39751          | SAMEA7502644-SAMEA7502661 |
| <i>Sphagnum fimbriatum</i>    | 11                | PRJEB39751          | SAMEA7502662-SAMEA7502673 |
| <i>Sphagnum flexuosum</i>     | 14                | PRJEB39751          | SAMEA7502674-SAMEA7502687 |
| <i>Sphagnum fuscum</i>        | 19                | PRJEB39751          | SAMEA7502688-SAMEA7502706 |
| <i>Sphagnum lindbergii</i>    | 14                | PRJEB39751          | SAMEA7502707-SAMEA7502720 |
| <i>Sphagnum platyphyllum</i>  | 12                | PRJEB39751          | SAMEA7502721-SAMEA7502732 |
| <i>Sphagnum riparium</i>      | 14                | PRJEB39751          | SAMEA7502733-SAMEA7502746 |
| <i>Sphagnum squarrosum</i>    | 19                | PRJEB39751          | SAMEA7502747-SAMEA7502765 |
| <i>Sphagnum subnitens</i>     | 19                | PRJEB39751          | SAMEA7502766-SAMEA7502784 |
| <i>Sphagnum tenellum</i>      | 20                | PRJEB39751          | SAMEA7502785-SAMEA7502804 |

**Table S2.** Summary of all summary statistics calculated accounting for among-species diversity.

|                   | Mean  | Median | SD    | SE    | Coefficient of Variation | Minimum | Maximum | Upper Quantile 75% | Lower Quantile 25% | Sample size |
|-------------------|-------|--------|-------|-------|--------------------------|---------|---------|--------------------|--------------------|-------------|
| Discordance       | 5.99  | 6.00   | 2.70  | 0.065 | 0.45                     | 0.00    | 18.00   | 8.00               | 4.00               | 1729        |
| Gene count        | 7.05  | 7.00   | 2.84  | 0.068 | 0.40                     | 0.00    | 17.00   | 9.00               | 5.00               | 1729        |
| Gene density      | 0.26  | 0.26   | 0.12  | 0.003 | 0.45                     | 0.00    | 0.79    | 0.34               | 0.17               | 1729        |
| Mean $d_{XY}$     | 0.02  | 0.02   | 0.002 | 0.000 | 0.08                     | 0.02    | 0.03    | 0.02               | 0.02               | 1729        |
| Mean $F_{ST}$     | 0.90  | 0.92   | 0.05  | 0.001 | 0.06                     | 0.53    | 0.97    | 0.93               | 0.89               | 1728        |
| Mean $\pi$        | 0.002 | 0.002  | 0.001 | 0.000 | 0.42                     | 0.001   | 0.007   | 0.002              | 0.002              | 1728        |
| Mean Tajima's $D$ | -3.19 | -3.32  | 0.45  | 0.011 | -0.14                    | -3.97   | -0.65   | -3.02              | -3.48              | 1729        |

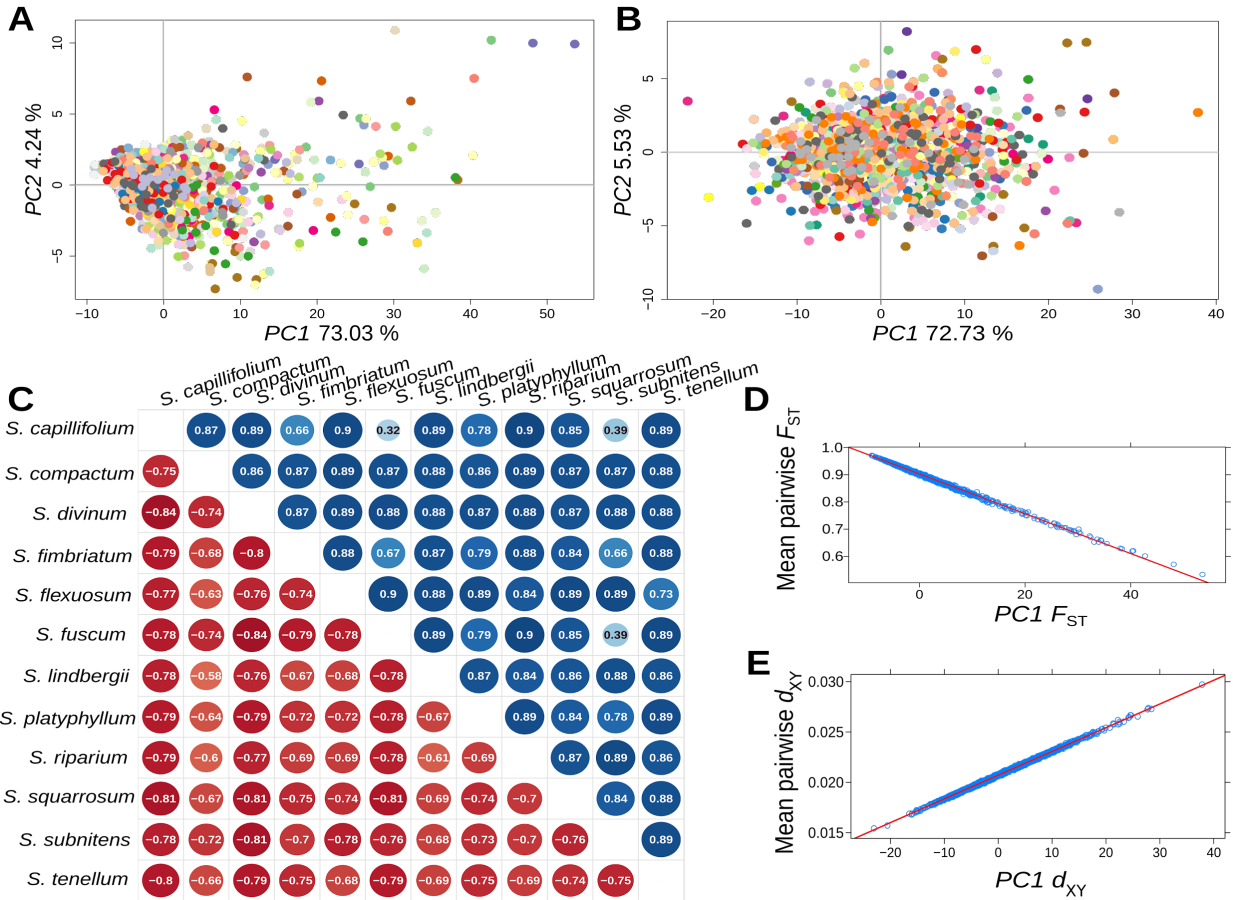

Fig. S1. Principal component analysis of pairwise  $F_{ST}$  and divergence in 100 Kb sliding windows for all species comparisons. (A) PCA plot of  $F_{ST}$ , (B) PCA of  $d_{XY}$  in 100-kbp sliding windows for all species, colour represents the scaffold the sliding window is located on, individual points correspond to the sliding windows, (C) Spearman's rank correlation coefficients between the loadings onto  $PC1$  and pairwise values of  $F_{ST}$  for all species (lower triangle) and  $d_{XY}$  for all species (upper triangle), all correlation was significant with  $p < 0.0001$ , (D) Spearman's rank correlation coefficients between the loadings onto  $PC1$  and mean window-based values of pairwise  $F_{ST}$  across the species, (E) Spearman's rank correlation coefficients between the loadings onto  $PC1$  and mean window-based values of pairwise  $d_{XY}$  across the species.

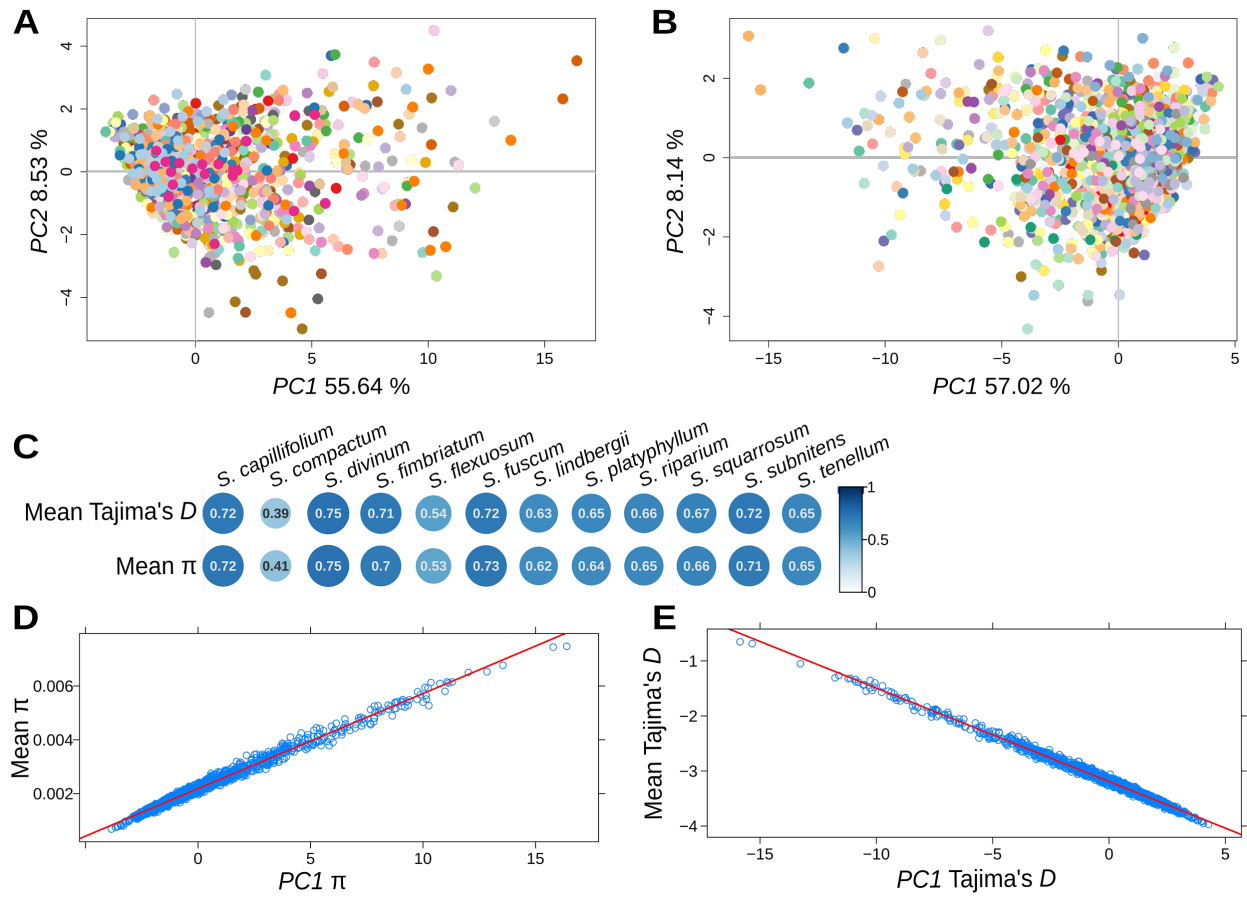

Fig. S2. Within-species diversity and Tajima's *D*. (A) PCA of  $\pi$  in 100-bp sliding windows for all species, (B) PCA for Tajima's *D* in 100-kbp sliding windows for all species, colour represents the scaffold the sliding window is located on, individual points correspond to the sliding windows, (C) Spearman's rank correlation coefficients between mean and within-species values of Tajima's *D* and  $\pi$ , (D) Spearman's rank correlation coefficients between the loadings onto *PC1* and mean  $\pi$  across the species, (E) Spearman's rank correlation coefficients between the loadings onto Tajima's *D* *PC1* and mean Tajima's *D* across the species.

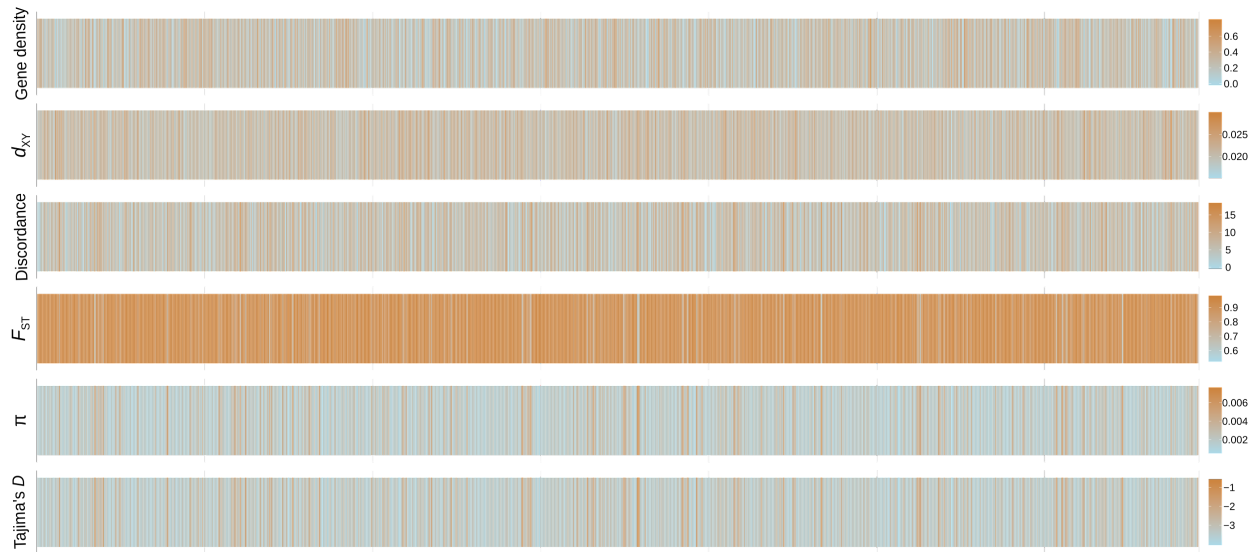

Fig. S3. Correlated genomic landscapes of summary statistics across 49 biggest scaffolds

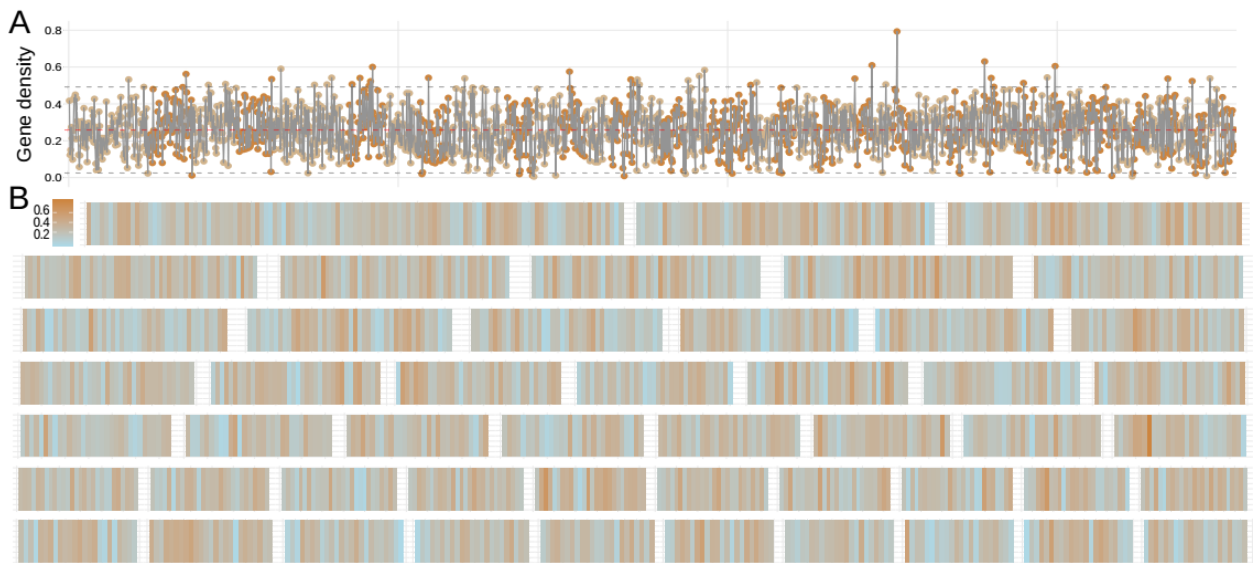

Fig. S4. Gene density distribution in 100-kbp sliding windows (A) across the 49 longest scaffolds, mean genome-wide density is shown in red, grey dotted lines represent mean genome-wide density  $\pm 2SD$ , (B) in each scaffold, colours represent gene density as shown on the right.

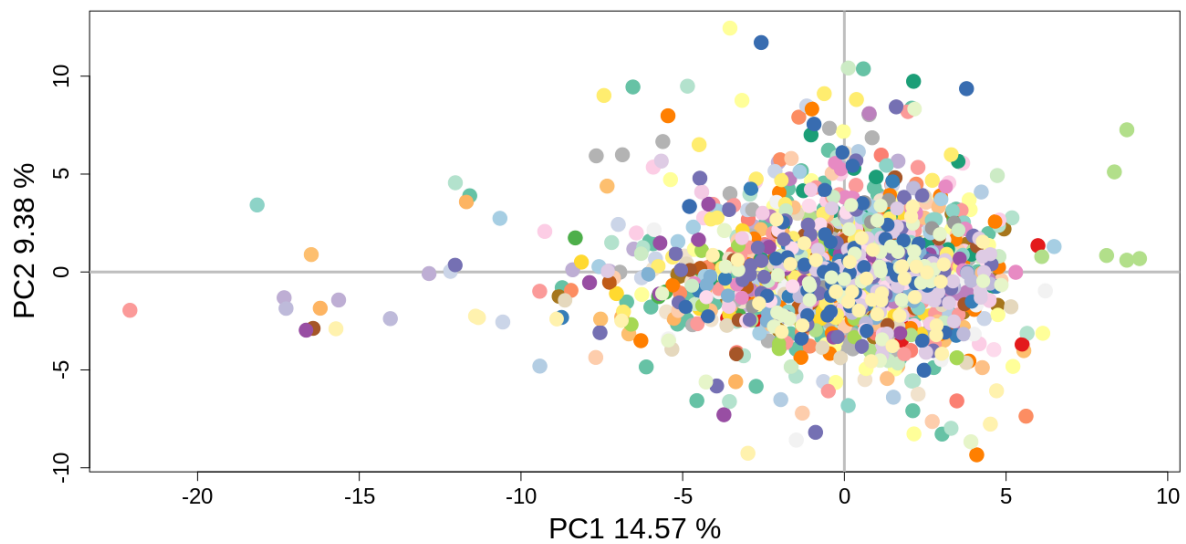

Fig. S5. Principal component analysis of difference between sympatric and allopatric pairwise  $F_{ST}$  in 100 Kb sliding windows for all species comparisons, colour represents the scaffold the sliding window is located on, individual points correspond to the sliding windows.

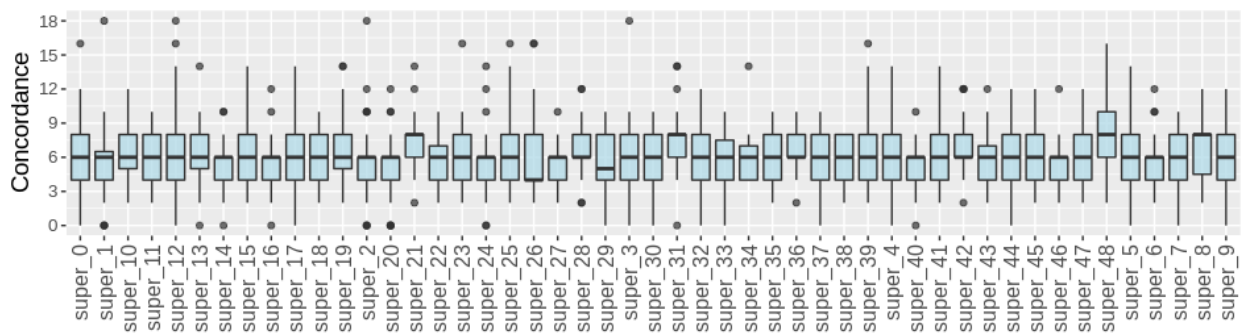

Fig. S6. Phylogenetic discordance score in 100-kbp sliding window trees summarized for each of the 49 longest scaffolds. In all boxplots, the central line is the median, and lower and upper hinges represent the first and third quartiles.

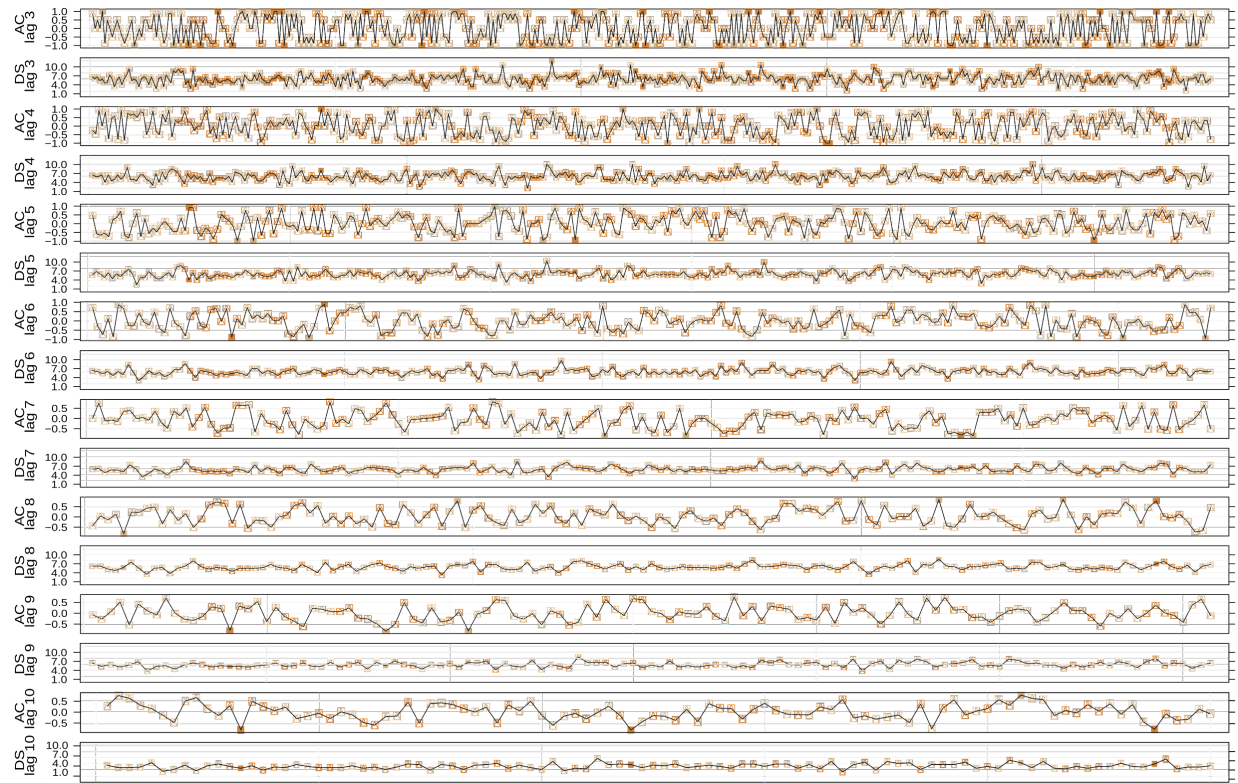

Fig. S7. Autocorrelation of phylogenetic discordance. The alternating panels show the distribution of autocorrelation coefficients (AC), and mean discordance scores (DS) in the corresponding set of windows across the genome, points filled with colour have a significant autocorrelation coefficient ( $p < 0.01$ ) with the next window set. Lag 3 to 10 correspond to lag sizes of 0,3 to 1 Mb ( $p = 0.01$ ), alternating colours represent different scaffolds.

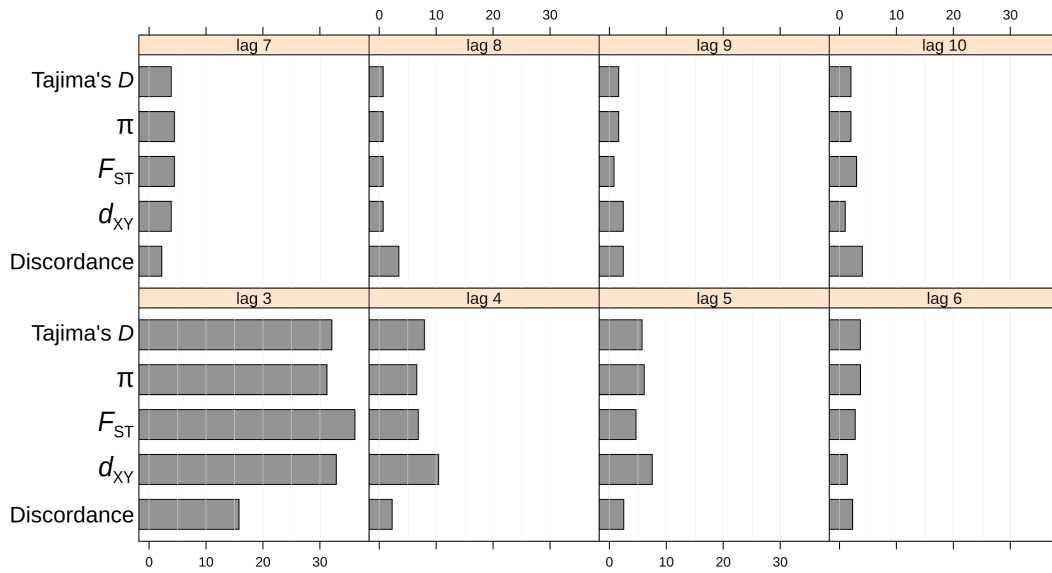

Fig. S8. Summary of autocorrelation analysis for all statistics analysed. The x axis shows the percentage of windows sets showing significant spatial correlation with the next window set for lag sizes of 0,3 to 1 Mb ( $p < 0.01$ ).

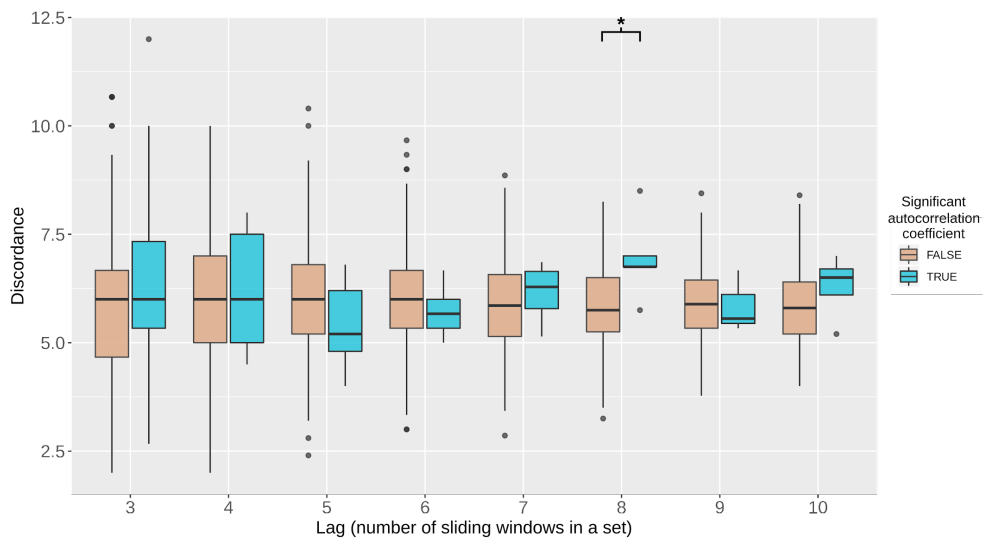

Fig. S9. Mean phylogenetic discordance in windows sets of different lag sizes (x axis) with significant and insignificant autocorrelation coefficients. Statistically significant comparisons are marked with \* (Student's t-test,  $p = 0.02$ ). In all boxplots, the central line is the median, and lower and upper hinges represent the first and third quartiles.
